# Supplementary material for: Wide-spread brain alterations early after the onset of Crohn’s disease in children in remission—a pilot study
Source: Front Neurosci. 2024 Dec 3;18:1491770. doi: 10.3389/fnins.2024.1491770 (PMC11649648; doi:10.3389/fnins.2024.1491770)
Supplement: Supplementary file 1 [file Table_1.XLSX]

## Sheet: Sheet1
	Supplementary table 1 - Main results of the comparison between patients with Crohn’s disease (CD) and healthy controls (HC) - extension of the main Table 2. Only MRI metrics detecting statistically significant results are presented (mean diffusivity [values multiplied by the factor of 1,000 for better legibility], fractional anisotropy, intracellular volume fraction and orientation dispersion ind…
Metric	Contrast	Anatomical structures in significant clusters	Seg. Count	Average [standard deviation]		Effect size	T statistic	p value (FDR)	Crohn's disease														Healthy controls
				Crohn's disease	Healthy controls				Subject 1	Subject 2	Subject 3	Subject 4	Subject 5	Subject 6	Subject 7	Subject 8	Subject 9	Subject 10	Subject 11	Subject 12	Subject 13	Subject 14	Subject 1	Subject 2	Subject 3	Subject 4	Subject 5	Subject 6	Subject 7	Subject 8	Subject 9	Subject 10	Subject 11	Subject 12	Subject 13	Subject 14
Mean diffusivity [mm2s-1 × 103]	CD < HC	L Dorsolateral Prefrontal Cortex, L Inferior Parietal Cortex, L Paracentral Lobular and Mid Cingulate Cortex, L Anterior Cingulate, L Premotor Cortex, L Superior Parietal and IPS, L Inferior Frontal Cortex, L Insular Cortex, L MT+ Complex and Neighboring Visual Areas, L Posterior Operculum, L Auditory Association Cortex, L Dorsal Stream Visual Cortex, L Orbital and Polar Frontal Cortex, L Somatos…	97	0.610 [0.007]	0.619 [0.008]	1.13517	-5.99539	0.00372174	0.607732	0.610755	0.611711	0.61684	0.597575	0.616357	0.621635	0.602228	0.60845	0.605395	0.602796	0.618523	0.611151	0.615499	0.630504	0.616305	0.619129	0.624189	0.612516	0.60265	0.628132	0.623229	0.614241	0.620489	0.632406	0.608186	0.622642	0.614791
		R Inferior Parietal Cortex, R Dorsolateral Prefrontal Cortex, R Superior Parietal and IPS, R Dorsal Stream Visual Cortex, R MT+ Complex and Neighboring Visual Areas, R Premotor Cortex, R Paracentral Lobular and Mid Cingulate Cortex, R Somatosensory and Motor Cortex, R Temporal-Parietal-Occipital Junction, R Inferior Frontal Cortex, R Orbital and Polar Frontal Cortex, R Auditory Association Cortex…	70	0.614 [0.008]	0.623 [0.008]	1.12992	-5.81327	0.00372174	0.613745	0.615089	0.614825	0.620273	0.601269	0.628051	0.624153	0.604961	0.613519	0.607622	0.605971	0.62346	0.612802	0.615071	0.630481	0.620142	0.621957	0.627326	0.616837	0.609973	0.63011	0.625997	0.624697	0.622451	0.640207	0.610451	0.625279	0.619289
Fractional anisotropy [unitless]	CD > HC	R Inferior Parietal Cortex, R Superior Parietal and IPS, R Auditory Association Cortex, R Early Auditory Cortex, R Paracentral Lobular and Mid Cingulate Cortex, R Posterior Operculum, R Somatosensory and Motor Cortex, R Temporal-Parietal-Occipital Junction	15	0.146 [0.004]	0.137 [0.005]	1.76838	4.63241	0.00658461	0.141476	0.143781	0.144369	0.148188	0.148864	0.148653	0.142196	0.151968	0.153167	0.145386	0.139011	0.141927	0.141043	0.147006	0.133651	0.137702	0.134248	0.134057	0.138156	0.140589	0.136777	0.136911	0.127879	0.148712	0.137026	0.140793	0.142132	0.135564
		R Dorsolateral Prefrontal Cortex, R Inferior Frontal Cortex, R Premotor Cortex, R Orbital and Polar Frontal Cortex	12	0.145 [0.004]	0.139 [0.004]	1.68014	4.18281	0.00658461	0.142054	0.143603	0.151208	0.140558	0.138923	0.144992	0.141694	0.149125	0.145541	0.147818	0.149517	0.145035	0.150546	0.143973	0.131101	0.139258	0.13628	0.134028	0.133683	0.141518	0.140719	0.135758	0.139856	0.145315	0.143064	0.142854	0.138369	0.139733
		R Ventral Stream Visual Cortex, R Dorsal Stream Visual Cortex, R Early Visual Cortex, R MT+ Complex and Neighboring Visual Areas, R Lateral Temporal Cortex, R Primary Visual Cortex	14	0.142 [0.004]	0.133 [0.006]	1.62372	5.35633	0.00658461	0.137158	0.142067	0.139086	0.146348	0.143358	0.13688	0.138839	0.138542	0.147537	0.147957	0.146053	0.134854	0.142382	0.144517	0.13023	0.137109	0.12909	0.129119	0.136086	0.138538	0.126345	0.125849	0.12864	0.144385	0.129557	0.14122	0.139395	0.132209
		R Premotor Cortex, R Posterior Operculum	4	0.153 [0.005]	0.146 [0.005]	1.60312	3.97377	0.00658461	0.150011	0.150401	0.150541	0.152357	0.160843	0.146379	0.161446	0.150361	0.155555	0.156554	0.15644	0.146257	0.151977	0.159188	0.145268	0.145593	0.151562	0.134916	0.147847	0.141355	0.14842	0.145431	0.147353	0.153275	0.143465	0.150722	0.141401	0.141505
		L Lateral Temporal Cortex, L Auditory Association Cortex	3	0.145 [0.006]	0.135 [0.006]	1.55969	4.04607	0.00658461	0.146496	0.141059	0.156742	0.140934	0.142461	0.148757	0.146213	0.150118	0.139459	0.153885	0.135863	0.140783	0.144607	0.13581	0.137603	0.133639	0.12702	0.122083	0.134443	0.136877	0.135035	0.136974	0.137415	0.147227	0.134123	0.138848	0.130748	0.138446
		L Superior Parietal and IPS, L Inferior Parietal Cortex	4	0.142 [0.005]	0.134 [0.006]	1.38974	4.11261	0.00658461	0.145657	0.151065	0.141362	0.13913	0.140706	0.146527	0.136802	0.143904	0.148023	0.138136	0.141118	0.132905	0.139896	0.140854	0.130187	0.133223	0.131177	0.131098	0.134217	0.136392	0.13261	0.129559	0.122774	0.148134	0.135569	0.14373	0.136762	0.13367
		L Anterior Cingulate, L Paracentral Lobular and Mid Cingulate Cortex	5	0.156 [0.004]	0.149 [0.006]	1.36192	3.15741	0.0129697	0.160716	0.151816	0.159006	0.153931	0.149547	0.159432	0.157452	0.154017	0.160484	0.157924	0.152923	0.15197	0.164792	0.156421	0.150814	0.144009	0.143509	0.140149	0.150108	0.155916	0.142264	0.146743	0.152048	0.164827	0.150249	0.150662	0.151457	0.144178
		L Early Visual Cortex, L Dorsal Stream Visual Cortex, L MT+ Complex and Neighboring Visual Areas, L Medial Temporal, L Posterior Cingulate, L Primary Visual Cortex	10	0.146 [0.005]	0.138 [0.007]	1.30791	4.10554	0.00658461	0.138627	0.1509	0.153864	0.147096	0.146895	0.141517	0.142076	0.146812	0.152328	0.147495	0.154028	0.141289	0.140028	0.139404	0.133856	0.137329	0.139294	0.126539	0.137219	0.147977	0.134098	0.128192	0.131866	0.148017	0.139771	0.146007	0.137324	0.142687
		R Cerebellum	4	0.200 [0.011]	0.191 [0.011]	0.842841	2.81726	0.0229286	0.187389	0.199922	0.193975	0.20494	0.205616	0.190064	0.18509	0.20334	0.210906	0.227175	0.196255	0.207945	0.189186	0.203292	0.192402	0.193557	0.196544	0.182357	0.207699	0.210424	0.204025	0.181139	0.185982	0.189436	0.171482	0.183395	0.193444	0.181362
		L Caudate	1	0.174 [0.033]	0.154 [0.009]	0.806447	3.07493	0.0226113	0.164067	0.160361	0.132915	0.13822	0.220638	0.153451	0.157347	0.162058	0.162077	0.157193	0.174104	0.201875	0.253615	0.193466	0.142126	0.156283	0.134784	0.143895	0.154107	0.165383	0.161877	0.149473	0.1543	0.161183	0.156746	0.162957	0.166578	0.147276
		L Putamen	1	0.176 [0.016]	0.166 [0.013]	0.707596	2.69802	0.0285333	0.194749	0.207586	0.170179	0.175706	0.171106	0.164347	0.143714	0.16597	0.185436	0.170201	0.172099	0.193796	0.171579	0.184232	0.137893	0.168768	0.149265	0.162486	0.161835	0.165961	0.166319	0.170727	0.171172	0.186349	0.15389	0.179336	0.181628	0.172277
Intracellular volume fraction [unitless]	CD > HC	R Superior Parietal and IPS, R Inferior Parietal Cortex, R Dorsolateral Prefrontal Cortex, R Dorsal Stream Visual Cortex, R Paracentral Lobular and Mid Cingulate Cortex, R Premotor Cortex, R Inferior Frontal Cortex, R Somatosensory and Motor Cortex, R Early Visual Cortex, R MT+ Complex and Neighboring Visual Areas, R Posterior Operculum, R Temporal-Parietal-Occipital Junction, R Orbital and Polar…	63	0.399 [0.009]	0.389 [0.008]	1.0851	6.45267	0.00389091	0.393978	0.391224	0.394897	0.393481	0.412292	0.384675	0.389136	0.414748	0.397618	0.410297	0.40446	0.391623	0.403297	0.398359	0.380834	0.388471	0.385399	0.384755	0.391066	0.400005	0.385301	0.382818	0.388044	0.400805	0.370785	0.397251	0.39429	0.397069
		L Dorsolateral Prefrontal Cortex, L Superior Parietal and IPS, L Inferior Parietal Cortex, L Paracentral Lobular and Mid Cingulate Cortex, L Premotor Cortex, L Dorsal Stream Visual Cortex, L Inferior Frontal Cortex, L MT+ Complex and Neighboring Visual Areas, L Somatosensory and Motor Cortex, L Orbital and Polar Frontal Cortex, L Early Visual Cortex, L Posterior Cingulate, L Anterior Cingulate, L…	82	0.399 [0.009]	0.389 [0.009]	1.05524	5.78757	0.00389091	0.395392	0.395186	0.396981	0.3906	0.415816	0.391205	0.388562	0.414697	0.398418	0.412828	0.403046	0.391058	0.401828	0.39427	0.377144	0.38502	0.384309	0.383675	0.392327	0.409182	0.38548	0.381158	0.396437	0.396401	0.375778	0.39842	0.389864	0.397466
		R Auditory Association Cortex	3	0.388 [0.009]	0.380 [0.010]	0.805548	2.94193	0.00998667	0.379507	0.386007	0.402052	0.374926	0.397075	0.375228	0.378418	0.396662	0.387515	0.392621	0.395126	0.374823	0.395584	0.389961	0.375533	0.372917	0.378424	0.373863	0.388335	0.395741	0.372685	0.373968	0.379092	0.393433	0.359234	0.389839	0.372465	0.388908
		R Auditory Association Cortex, R Lateral Temporal Cortex	3	0.383 [0.008]	0.377 [0.008]	0.804257	3.56496	0.00389091	0.374936	0.372957	0.38867	0.377487	0.390978	0.377626	0.381299	0.399895	0.38129	0.390345	0.382663	0.369994	0.38945	0.385642	0.374902	0.380049	0.378206	0.37032	0.382593	0.378217	0.373129	0.3666	0.379893	0.386252	0.359719	0.390554	0.3708	0.380351
		L Insular Cortex	3	0.384 [0.010]	0.377 [0.010]	0.681563	2.44163	0.0278017	0.369667	0.373127	0.380569	0.375548	0.393887	0.379304	0.378192	0.405976	0.375823	0.394468	0.395509	0.385033	0.387814	0.375883	0.360183	0.378361	0.363843	0.373317	0.385864	0.388325	0.368858	0.3719	0.390442	0.383929	0.36756	0.389026	0.371189	0.380591
Orientation dispersion index [unitless]	CD < HC	R Cerebellum	5	0.438 [0.020]	0.462 [0.025]	1.063	-3.60807	0.0285333	0.447537	0.442829	0.423489	0.418826	0.438032	0.452475	0.471923	0.443844	0.422527	0.402046	0.434686	0.441594	0.472543	0.414272	0.450276	0.439759	0.426949	0.476678	0.434363	0.431191	0.457543	0.480422	0.458883	0.475569	0.518415	0.465334	0.46394	0.48751
		L Caudate	1	0.514 [0.067]	0.555 [0.019]	0.836267	-3.18863	0.0428	0.53823	0.53781	0.584296	0.605994	0.445727	0.518532	0.564312	0.540754	0.517503	0.575977	0.494917	0.478086	0.356453	0.433925	0.585431	0.55043	0.584177	0.570924	0.543531	0.542838	0.533876	0.572136	0.551619	0.552414	0.544664	0.556239	0.516921	0.568425
		L Cerebellum	1	0.448 [0.022]	0.466 [0.024]	0.763268	-2.91028	0.0463667	0.460413	0.455888	0.457231	0.403764	0.447957	0.462534	0.475309	0.438245	0.428755	0.431614	0.450249	0.439354	0.491112	0.435082	0.471188	0.477482	0.434588	0.490791	0.445915	0.440941	0.43935	0.505608	0.482281	0.440143	0.494001	0.483162	0.444721	0.471932
		L Putamen	1	0.545 [0.037]	0.568 [0.022]	0.742122	-2.82966	0.0399467	0.518561	0.460644	0.553773	0.532941	0.555797	0.545461	0.602915	0.577716	0.533326	0.585074	0.58149	0.546617	0.539442	0.500024	0.60582	0.561141	0.596091	0.555218	0.566054	0.588152	0.575682	0.569717	0.563384	0.534445	0.593329	0.561811	0.545703	0.533641
